# Supplementary material for: Research on the City Network Structure in the Yellow River Basin in China Based on Two-Way Time Distance Gravity Model and Social Network Analysis Method
Source: Hindawi journal article supplement (doi:10.1155/2020/6680954), 2020-12-22
Supplement: f1 [file 6680954.f1.pdf]

|                 |     |     |     |     |     |          |          |          |          |          |
|-----------------|-----|-----|-----|-----|-----|----------|----------|----------|----------|----------|
| Qingyang        | 266 | 267 | 270 | 270 | 270 | 6688607  | 6094314  | 5978324  | 2029988  | 7081499  |
| Dingxi          | 301 | 301 | 303 | 303 | 304 | 2901643  | 3049178  | 3310768  | 767389   | 3562609  |
| Longnan         | 283 | 286 | 288 | 287 | 288 | 2625279  | 3151353  | 3398884  | 1093212  | 3792273  |
| <b>Qinghai</b>  | 375 | 371 |     |     |     | 14314738 |          |          |          |          |
| Xining          | 203 | 201 | 203 | 206 | 207 | 10657811 | 11316193 | 12481677 | 10086748 | 12864137 |
| Haidong         | 172 | 170 | 171 | 172 | 173 | 3656927  | 3843963  | 4227986  | 1653467  | 4514606  |
| <b>Ningxia</b>  | 692 | 664 |     |     |     | 27379176 |          |          |          |          |
| Yinchuan        | 196 | 179 | 184 | 189 | 193 | 13886244 | 14938590 | 16177071 | 11039244 | 19014824 |
| Shizuishan      | 77  | 75  | 75  | 74  | 74  | 4672622  | 4823793  | 5135744  | 3771905  | 6059184  |
| Wuzhong         | 144 | 140 | 142 | 143 | 144 | 3834317  | 4048073  | 4424283  | 1895152  | 5345336  |
| Guyuan          | 153 | 150 | 150 | 151 | 151 | 2010289  | 2170391  | 2398058  | 1176599  | 3031944  |
| Zhongwei        | 122 | 120 | 121 | 122 | 122 | 2975704  | 3168907  | 3391289  | 1716928  | 4029947  |
| <b>Xinjiang</b> | 306 | 297 |     |     |     | 33091423 |          |          |          |          |
| Urumqi          | 267 | 267 | 268 | 223 | 222 | 24614698 | 26316398 | 24589766 | 27075290 | 30997659 |
| Karamay         | 39  | 30  | 30  | 31  | 31  | 8476725  | 6294299  | 6209989  | 7445034  | 8981420  |



Supplemental Files (3): The transfer experience of city officials in the Yellow River basin

| ID | former       | succession | time | POINT_X_1 | POINT_Y_1 | POINT_X_2 | POINT_Y_2 |
|----|--------------|------------|------|-----------|-----------|-----------|-----------|
| 1  | Baiyin       | Lanzhou    | 4    | 104.18    | 36.54     | 103.75    | 36.07     |
| 2  | Dingxi       | Dingxi     | 1    | 104.62    | 35.58     | 104.62    | 35.58     |
| 3  | Dingxi       | Lanzhou    | 3    | 104.62    | 35.58     | 103.75    | 36.07     |
| 4  | Jiayuguan    | Jiayuguan  | 3    | 98.27     | 39.8      | 98.27     | 39.8      |
| 5  | Jiayuguan    | Jiuquan    | 1    | 98.27     | 39.8      | 98.51     | 39.75     |
| 6  | Jiayuguan    | Lanzhou    | 1    | 98.27     | 39.8      | 103.75    | 36.07     |
| 7  | Jiayuguan    | Pingliang  | 1    | 98.27     | 39.8      | 106.68    | 35.54     |
| 8  | Jiayuguan    | Wuwei      | 1    | 98.27     | 39.8      | 102.63    | 37.93     |
| 9  | Jinchang     | Dingxi     | 1    | 102.17    | 38.5      | 104.62    | 35.58     |
| 10 | Jinchang     | Jinchang   | 1    | 102.17    | 38.5      | 102.17    | 38.5      |
| 11 | Jinchang     | Lanzhou    | 3    | 102.17    | 38.5      | 103.75    | 36.07     |
| 12 | Jiuquan      | Lanzhou    | 6    | 98.51     | 39.75     | 103.75    | 36.07     |
| 13 | Pingliang    | Lanzhou    | 3    | 106.68    | 35.54     | 103.75    | 36.07     |
| 14 | Pingliang    | Pingliang  | 1    | 106.68    | 35.54     | 106.68    | 35.54     |
| 15 | Pingliang    | Tianshui   | 1    | 106.68    | 35.54     | 105.72    | 34.58     |
| 16 | Qingyang     | Baiyin     | 1    | 107.62    | 35.73     | 104.18    | 36.54     |
| 17 | Qingyang     | Lanzhou    | 3    | 107.62    | 35.73     | 103.75    | 36.07     |
| 18 | Qingyang     | Qingyang   | 1    | 107.62    | 35.73     | 107.62    | 35.73     |
| 19 | Tianshui     | Lanzhou    | 3    | 105.72    | 34.58     | 103.75    | 36.07     |
| 20 | Tianshui     | Zhangye    | 1    | 105.72    | 34.58     | 100.45    | 38.94     |
| 21 | Wuwei        | Baiyin     | 1    | 102.63    | 37.93     | 104.18    | 36.54     |
| 22 | Wuwei        | Lanzhou    | 4    | 102.63    | 37.93     | 103.75    | 36.07     |
| 23 | Zhangye      | Lanzhou    | 1    | 100.45    | 38.94     | 103.75    | 36.07     |
| 24 | Zhangye      | Qingyang   | 1    | 100.45    | 38.94     | 107.62    | 35.73     |
| 25 | Zhangye      | Xi'An      | 1    | 100.45    | 38.94     | 108.95    | 34.26     |
| 26 | Anyang       | Anyang     | 1    | 114.35    | 36.1      | 114.35    | 36.1      |
| 27 | Anyang       | Zhengzhou  | 4    | 114.35    | 36.1      | 113.65    | 34.76     |
| 28 | Hebi         | Anyang     | 1    | 114.16    | 35.94     | 114.35    | 36.1      |
| 29 | Hebi         | Hebi       | 3    | 114.16    | 35.94     | 114.16    | 35.94     |
| 30 | Hebi         | Shangqiu   | 1    | 114.16    | 35.94     | 115.65    | 34.44     |
| 31 | Hebi         | Taiyuan    | 1    | 114.16    | 35.94     | 112.57    | 37.87     |
| 32 | Hebi         | Zhengzhou  | 2    | 114.16    | 35.94     | 113.65    | 34.76     |
| 33 | Jiaozuo      | Jiaozuo    | 1    | 113.22    | 35.25     | 113.22    | 35.25     |
| 34 | Jiaozuo      | Zhengzhou  | 4    | 113.22    | 35.25     | 113.65    | 34.76     |
| 35 | Kaifeng      | Kaifeng    | 2    | 114.35    | 34.79     | 114.35    | 34.79     |
| 36 | Kaifeng      | Zhengzhou  | 2    | 114.35    | 34.79     | 113.65    | 34.76     |
| 37 | Luoyang      | Xi'An      | 1    | 112.43    | 34.67     | 108.95    | 34.26     |
| 38 | Luoyang      | Zhengzhou  | 3    | 112.43    | 34.67     | 113.65    | 34.76     |
| 39 | Luohe        | Luohe      | 2    | 114.04    | 33.57     | 114.04    | 33.57     |
| 40 | Luohe        | Zhengzhou  | 2    | 114.04    | 33.57     | 113.65    | 34.76     |
| 41 | Nanyang      | Nanyang    | 1    | 112.54    | 33        | 112.54    | 33        |
| 42 | Nanyang      | Zhengzhou  | 4    | 112.54    | 33        | 113.65    | 34.76     |
| 43 | Pingdingshan | ingdingsha | 1    | 113.3     | 33.74     | 113.3     | 33.74     |
| 44 | Pingdingshan | Xinxiang   | 1    | 113.3     | 33.74     | 113.87    | 35.31     |
| 45 | Pingdingshan | Zhengzhou  | 4    | 113.3     | 33.74     | 113.65    | 34.76     |
| 46 | Puyang       | Puyang     | 1    | 115.02    | 35.7      | 115.02    | 35.7      |
| 47 | Puyang       | Zhengzhou  | 6    | 115.02    | 35.7      | 113.65    | 34.76     |
| 48 | Sanmenxia    | Nanyang    | 1    | 111.2     | 34.78     | 112.54    | 33        |
| 49 | Sanmenxia    | Sanmenxia  | 2    | 111.2     | 34.78     | 111.2     | 34.78     |
| 50 | Shangqiu     | Shangqiu   | 1    | 115.65    | 34.44     | 115.65    | 34.44     |
| 51 | Shangqiu     | Zhengzhou  | 3    | 115.65    | 34.44     | 113.65    | 34.76     |
| 52 | Shangqiu     | Zhumadian  | 1    | 115.65    | 34.44     | 114.04    | 32.98     |
| 53 | Xinxiang     | Jiaozuo    | 1    | 113.87    | 35.31     | 113.22    | 35.25     |
| 54 | Xinxiang     | Xinxiang   | 1    | 113.87    | 35.31     | 113.87    | 35.31     |
| 55 | Xinxiang     | Zhengzhou  | 3    | 113.87    | 35.31     | 113.65    | 34.76     |
| 56 | Xinyang      | ingdingsha | 1    | 114.07    | 32.13     | 113.3     | 33.74     |

|     |            |           |   |        |       |        |       |
|-----|------------|-----------|---|--------|-------|--------|-------|
| 57  | Xinyang    | Xinyang   | 2 | 114.07 | 32.13 | 114.07 | 32.13 |
| 58  | Xinyang    | Zhengzhou | 1 | 114.07 | 32.13 | 113.65 | 34.76 |
| 59  | Xuchang    | Luoyang   | 1 | 113.82 | 34.03 | 112.43 | 34.67 |
| 60  | Xuchang    | Xinyang   | 1 | 113.82 | 34.03 | 114.07 | 32.13 |
| 61  | Xuchang    | Xuchang   | 1 | 113.82 | 34.03 | 113.82 | 34.03 |
| 62  | Xuchang    | Zhengzhou | 3 | 113.82 | 34.03 | 113.65 | 34.76 |
| 63  | Zhengzhou  | Zhengzhou | 4 | 113.65 | 34.76 | 113.65 | 34.76 |
| 64  | Zhoukou    | Zhengzhou | 1 | 114.64 | 33.63 | 113.65 | 34.76 |
| 65  | Zhoukou    | Zhoukou   | 3 | 114.64 | 33.63 | 114.64 | 33.63 |
| 66  | Zhumadian  | Luoyang   | 1 | 114.04 | 32.98 | 112.43 | 34.67 |
| 67  | Zhumadian  | Luohe     | 1 | 114.04 | 32.98 | 114.04 | 33.57 |
| 68  | Zhumadian  | Zhengzhou | 1 | 114.04 | 32.98 | 113.65 | 34.76 |
| 69  | Zhumadian  | Zhumadian | 2 | 114.04 | 32.98 | 114.04 | 32.98 |
| 70  | Bayannur   | Bayannur  | 2 | 107.38 | 40.75 | 107.38 | 40.75 |
| 71  | Bayannur   | Hohhot    | 2 | 107.38 | 40.75 | 111.66 | 40.82 |
| 72  | Baotou     | Hohhot    | 4 | 109.85 | 40.67 | 111.66 | 40.82 |
| 73  | Baotou     | Ulangab   | 1 | 109.85 | 40.67 | 113.12 | 41.02 |
| 74  | Erdos      | Erdos     | 1 | 109.97 | 39.63 | 109.97 | 39.63 |
| 75  | Erdos      | Hohhot    | 4 | 109.97 | 39.63 | 111.66 | 40.82 |
| 76  | Hohhot     | Hohhot    | 4 | 111.66 | 40.82 | 111.66 | 40.82 |
| 77  | Wuhai      | Hohhot    | 1 | 106.82 | 39.67 | 111.66 | 40.82 |
| 78  | Wuhai      | Wuhai     | 2 | 106.82 | 39.67 | 106.82 | 39.67 |
| 79  | Wuhai      | Ulangab   | 1 | 106.82 | 39.67 | 113.12 | 41.02 |
| 80  | Ulangab    | Hohhot    | 3 | 113.12 | 41.02 | 111.66 | 40.82 |
| 81  | Ulangab    | Ulangab   | 2 | 113.12 | 41.02 | 113.12 | 41.02 |
| 82  | Guyuan     | Wuzhong   | 1 | 106.28 | 36.01 | 106.2  | 37.99 |
| 83  | Guyuan     | Yinchuan  | 3 | 106.28 | 36.01 | 106.27 | 38.47 |
| 84  | Shizuishan | Guyuan    | 1 | 106.38 | 39.02 | 106.28 | 36.01 |
| 85  | Shizuishan | Wuzhong   | 1 | 106.38 | 39.02 | 106.2  | 37.99 |
| 86  | Shizuishan | Yinchuan  | 3 | 106.38 | 39.02 | 106.27 | 38.47 |
| 87  | Wuzhong    | Yinchuan  | 4 | 106.2  | 37.99 | 106.27 | 38.47 |
| 88  | Yinchuan   | Yinchuan  | 5 | 106.27 | 38.47 | 106.27 | 38.47 |
| 89  | Zhongwei   | Guyuan    | 1 | 105.17 | 37.52 | 106.28 | 36.01 |
| 90  | Zhongwei   | Yinchuan  | 4 | 105.17 | 37.52 | 106.27 | 38.47 |
| 91  | Binzhou    | Binzhou   | 2 | 118.02 | 37.37 | 118.02 | 37.37 |
| 92  | Dezhou     | Jinan     | 3 | 116.29 | 37.45 | 117.01 | 36.67 |
| 93  | Dezhou     | Linyi     | 1 | 116.29 | 37.45 | 118.34 | 35.07 |
| 94  | Dongying   | Dongying  | 2 | 118.5  | 37.46 | 118.5  | 37.46 |
| 95  | Dongying   | Jinan     | 4 | 118.5  | 37.46 | 117.01 | 36.67 |
| 96  | Heze       | Heze      | 1 | 115.45 | 35.25 | 115.45 | 35.25 |
| 97  | Heze       | Jinan     | 3 | 115.45 | 35.25 | 117.01 | 36.67 |
| 98  | Jinan      | Jinan     | 3 | 117.01 | 36.67 | 117.01 | 36.67 |
| 99  | Jining     | Jinan     | 4 | 116.58 | 35.41 | 117.01 | 36.67 |
| 100 | Jining     | Jining    | 2 | 116.58 | 35.41 | 116.58 | 35.41 |
| 101 | Liaocheng  | Jinan     | 2 | 115.99 | 36.45 | 117.01 | 36.67 |
| 102 | Liaocheng  | Liaocheng | 1 | 115.99 | 36.45 | 115.99 | 36.45 |
| 103 | Liaocheng  | Linyi     | 1 | 115.99 | 36.45 | 118.34 | 35.07 |
| 104 | Linyi      | Jinan     | 4 | 118.34 | 35.07 | 117.01 | 36.67 |
| 105 | Linyi      | Linyi     | 1 | 118.34 | 35.07 | 118.34 | 35.07 |
| 106 | Linyi      | Qingdao   | 1 | 118.34 | 35.07 | 120.36 | 36.13 |
| 107 | Linyi      | Yantai    | 1 | 118.34 | 35.07 | 121.38 | 37.54 |
| 108 | Qingdao    | Jinan     | 2 | 120.36 | 36.13 | 117.01 | 36.67 |
| 109 | Rizhao     | Jinan     | 1 | 119.45 | 35.43 | 117.01 | 36.67 |
| 110 | Rizhao     | Qingdao   | 1 | 119.45 | 35.43 | 120.36 | 36.13 |
| 111 | Rizhao     | Rizhao    | 2 | 119.45 | 35.43 | 119.45 | 35.43 |
| 112 | Rizhao     | Zaozhuang | 1 | 119.45 | 35.43 | 117.56 | 34.87 |
| 113 | Tai'an     | Jinan     | 4 | 117.12 | 36.19 | 117.01 | 36.67 |
| 114 | Tai'an     | Tai'an    | 2 | 117.12 | 36.19 | 117.12 | 36.19 |

|     |           |           |   |        |       |        |       |
|-----|-----------|-----------|---|--------|-------|--------|-------|
| 115 | Weihai    | Jinan     | 2 | 122.11 | 37.5  | 117.01 | 36.67 |
| 116 | Weihai    | Weihai    | 2 | 122.11 | 37.5  | 122.11 | 37.5  |
| 117 | Weifang   | Dongying  | 1 | 119.11 | 36.7  | 118.5  | 37.46 |
| 118 | Weifang   | Jinan     | 1 | 119.11 | 36.7  | 117.01 | 36.67 |
| 119 | Weifang   | Qingdao   | 1 | 119.11 | 36.7  | 120.36 | 36.13 |
| 120 | Weifang   | Weifang   | 2 | 119.11 | 36.7  | 119.11 | 36.7  |
| 121 | Weifang   | Zibo      | 1 | 119.11 | 36.7  | 118.06 | 36.79 |
| 122 | Yantai    | Jinan     | 1 | 121.38 | 37.54 | 117.01 | 36.67 |
| 123 | Yantai    | Qingdao   | 1 | 121.38 | 37.54 | 120.36 | 36.13 |
| 124 | Yantai    | Yantai    | 3 | 121.38 | 37.54 | 121.38 | 37.54 |
| 125 | Zaozhuang | Jinan     | 1 | 117.56 | 34.87 | 117.01 | 36.67 |
| 126 | Zaozhuang | Linyi     | 1 | 117.56 | 34.87 | 118.34 | 35.07 |
| 127 | Zaozhuang | Zaozhuang | 2 | 117.56 | 34.87 | 117.56 | 34.87 |
| 128 | Zibo      | Jinan     | 1 | 118.06 | 36.79 | 117.01 | 36.67 |
| 129 | Zibo      | Liaocheng | 1 | 118.06 | 36.79 | 115.99 | 36.45 |
| 130 | Zibo      | Yantai    | 1 | 118.06 | 36.79 | 121.38 | 37.54 |
| 131 | Datong    | Taiyuan   | 1 | 113.3  | 40.1  | 112.57 | 37.87 |
| 132 | Datong    | Xinzhou   | 1 | 113.3  | 40.1  | 112.73 | 38.4  |
| 133 | Jincheng  | Datong    | 1 | 112.84 | 35.51 | 113.3  | 40.1  |
| 134 | Jincheng  | Shuozhou  | 1 | 112.84 | 35.51 | 112.42 | 39.31 |
| 135 | Jincheng  | Taiyuan   | 3 | 112.84 | 35.51 | 112.57 | 37.87 |
| 136 | Jincheng  | Yuncheng  | 1 | 112.84 | 35.51 | 110.99 | 35.01 |
| 137 | Jinzhong  | Jinzhong  | 3 | 112.75 | 37.68 | 112.75 | 37.68 |
| 138 | Jinzhong  | Taiyuan   | 3 | 112.75 | 37.68 | 112.57 | 37.87 |
| 139 | Linfen    | Linfen    | 2 | 111.51 | 36.08 | 111.51 | 36.08 |
| 140 | Linfen    | Taiyuan   | 2 | 111.51 | 36.08 | 112.57 | 37.87 |
| 141 | Lvliang   | Jincheng  | 1 | 111.13 | 37.52 | 112.84 | 35.51 |
| 142 | Lvliang   | Taiyuan   | 4 | 111.13 | 37.52 | 112.57 | 37.87 |
| 143 | Shuozhou  | Shuozhou  | 1 | 112.42 | 39.31 | 112.42 | 39.31 |
| 144 | Shuozhou  | Taiyuan   | 4 | 112.42 | 39.31 | 112.57 | 37.87 |
| 145 | Shuozhou  | Yuncheng  | 2 | 112.42 | 39.31 | 110.99 | 35.01 |
| 146 | Shuozhou  | Changzhi  | 1 | 112.42 | 39.31 | 113.11 | 36.18 |
| 147 | Taiyuan   | Taiyuan   | 2 | 112.57 | 37.87 | 112.57 | 37.87 |
| 148 | Xinzhou   | Taiyuan   | 1 | 112.73 | 38.4  | 112.57 | 37.87 |
| 149 | Yangquan  | Linfen    | 1 | 113.57 | 37.86 | 111.51 | 36.08 |
| 150 | Yangquan  | Taiyuan   | 1 | 113.57 | 37.86 | 112.57 | 37.87 |
| 151 | Yangquan  | Yangquan  | 1 | 113.57 | 37.86 | 113.57 | 37.86 |
| 152 | Yangquan  | Yuncheng  | 1 | 113.57 | 37.86 | 110.99 | 35.01 |
| 153 | Yuncheng  | Lvliang   | 2 | 110.99 | 35.01 | 111.13 | 37.52 |
| 154 | Yuncheng  | Shuozhou  | 2 | 110.99 | 35.01 | 112.42 | 39.31 |
| 155 | Yuncheng  | Taiyuan   | 1 | 110.99 | 35.01 | 112.57 | 37.87 |
| 156 | Yuncheng  | Xining    | 1 | 110.99 | 35.01 | 101.79 | 36.61 |
| 157 | Changzhi  | Lvliang   | 1 | 113.11 | 36.18 | 111.13 | 37.52 |
| 158 | Changzhi  | Taiyuan   | 4 | 113.11 | 36.18 | 112.57 | 37.87 |
| 159 | Changzhi  | Changzhi  | 1 | 113.11 | 36.18 | 113.11 | 36.18 |
| 160 | Ankang    | Ankang    | 2 | 109.03 | 32.69 | 109.03 | 32.69 |
| 161 | Ankang    | Baoji     | 1 | 109.03 | 32.69 | 107.14 | 34.38 |
| 162 | Ankang    | Xi'An     | 2 | 109.03 | 32.69 | 108.95 | 34.26 |
| 163 | Baoji     | Baoji     | 2 | 107.14 | 34.38 | 107.14 | 34.38 |
| 164 | Baoji     | Xi'An     | 3 | 107.14 | 34.38 | 108.95 | 34.26 |
| 165 | Hanzhong  | Hanzhong  | 3 | 107.03 | 33.08 | 107.03 | 33.08 |
| 166 | Hanzhong  | Shangluo  | 1 | 107.03 | 33.08 | 109.93 | 33.87 |
| 167 | Hanzhong  | Xi'An     | 2 | 107.03 | 33.08 | 108.95 | 34.26 |
| 168 | Shangluo  | Hanzhong  | 1 | 109.93 | 33.87 | 107.03 | 33.08 |
| 169 | Shangluo  | Shangluo  | 1 | 109.93 | 33.87 | 109.93 | 33.87 |
| 170 | Shangluo  | Xi'An     | 2 | 109.93 | 33.87 | 108.95 | 34.26 |
| 171 | Tongchuan | Tongchuan | 3 | 109.06 | 35.08 | 109.06 | 35.08 |
| 172 | Tongchuan | Xi'An     | 4 | 109.06 | 35.08 | 108.95 | 34.26 |



|     |          |          |   |        |       |        |       |
|-----|----------|----------|---|--------|-------|--------|-------|
| 173 | Weinan   | Weinan   | 2 | 109.5  | 34.5  | 109.5  | 34.5  |
| 174 | Weinan   | Xi'An    | 3 | 109.5  | 34.5  | 108.95 | 34.26 |
| 175 | Weinan   | Yan'An   | 1 | 109.5  | 34.5  | 109.47 | 36.59 |
| 176 | Xi'An    | Xi'An    | 3 | 108.95 | 34.26 | 108.95 | 34.26 |
| 177 | Xianyang | Weinan   | 1 | 108.71 | 34.34 | 109.5  | 34.5  |
| 178 | Xianyang | Xi'An    | 2 | 108.71 | 34.34 | 108.95 | 34.26 |
| 179 | Xianyang | Xianyang | 1 | 108.71 | 34.34 | 108.71 | 34.34 |
| 180 | Yan'An   | Xi'An    | 3 | 109.47 | 36.59 | 108.95 | 34.26 |
| 181 | Yulin    | Weinan   | 1 | 109.76 | 38.3  | 109.5  | 34.5  |
| 182 | Yulin    | Xi'An    | 3 | 109.76 | 38.3  | 108.95 | 34.26 |



Supplemental Files (5): Results of cities' Degree centrality, Closeness centrality, and Betweenness centrality in the city networks of Yellow River basin

|              | Out-degree centrality | In-degree centrality | Out-Closeness centrality | In-Closeness centrality | Betweenness centrality |
|--------------|-----------------------|----------------------|--------------------------|-------------------------|------------------------|
| Taiyuan      | 0.0519                | 0.2208               | 0.3130                   | 0.4162                  | 0.2738                 |
| Datong       | 0.1688                | 0.0649               | 0.4118                   | 0.2790                  | 0.2419                 |
| Yangquan     | 0.1818                | 0.1039               | 0.4096                   | 0.3453                  | 0.5425                 |
| Changzhi     | 0.3377                | 0.0649               | 0.4400                   | 0.3565                  | 0.8351                 |
| Jincheng     | 0.2468                | 0.0260               | 0.3738                   | 0.3092                  | 0.1204                 |
| Shuozhou     | 0.1818                | 0.0779               | 0.4254                   | 0.2906                  | 0.3799                 |
| Jinzhong     | 0.0519                | 0.1558               | 0.3130                   | 0.3720                  | 0.0255                 |
| Yuncheng     | 0.1299                | 0.2597               | 0.3598                   | 0.4451                  | 0.5197                 |
| Xinzhou      | 0.0909                | 0.1299               | 0.3422                   | 0.3581                  | 0.4958                 |
| Linfen       | 0.1039                | 0.2338               | 0.3581                   | 0.4278                  | 0.3925                 |
| Lvliang      | 0.1688                | 0.1039               | 0.4326                   | 0.3249                  | 0.7292                 |
| Hohhot       | 0.1039                | 0.1039               | 0.3667                   | 0.2492                  | 0.1793                 |
| Baotou       | 0.0909                | 0.1039               | 0.3684                   | 0.2492                  | 0.2351                 |
| Wuhai        | 0.0909                | 0.0519               | 0.3056                   | 0.2348                  | 0.0515                 |
| Erdos        | 0.1039                | 0.1169               | 0.3615                   | 0.2821                  | 0.3045                 |
| Bayannur     | 0.1039                | 0.0519               | 0.3362                   | 0.2299                  | 0.0514                 |
| Ulanqab      | 0.0779                | 0.0519               | 0.3348                   | 0.2348                  | 0.0041                 |
| Jinan        | 0.0909                | 0.2597               | 0.2399                   | 0.4639                  | 0.3049                 |
| Qingdao      | 0.1169                | 0.1558               | 0.2702                   | 0.3453                  | 0.0736                 |
| Zibo         | 0.1039                | 0.1818               | 0.2702                   | 0.3775                  | 0.1325                 |
| Zaozhuang    | 0.1688                | 0.0909               | 0.2895                   | 0.3756                  | 0.1657                 |
| Dongying     | 0.1169                | 0.0390               | 0.2721                   | 0.2984                  | 0.0018                 |
| Yantai       | 0.1039                | 0.1169               | 0.3249                   | 0.3105                  | 0.6589                 |
| Weifang      | 0.1299                | 0.1948               | 0.2711                   | 0.3793                  | 0.2311                 |
| Jining       | 0.2338                | 0.1169               | 0.3249                   | 0.3738                  | 0.3108                 |
| Tai'an       | 0.0909                | 0.2078               | 0.2558                   | 0.4096                  | 0.0702                 |
| Weihai       | 0.0519                | 0.0390               | 0.2533                   | 0.2780                  | 0.0000                 |
| Rizhao       | 0.0909                | 0.0649               | 0.2655                   | 0.3056                  | 0.0003                 |
| Linyi        | 0.1429                | 0.1429               | 0.2939                   | 0.3438                  | 0.1847                 |
| Dezhou       | 0.1039                | 0.2078               | 0.2593                   | 0.4010                  | 0.2208                 |
| Liaocheng    | 0.2078                | 0.0779               | 0.3182                   | 0.3598                  | 0.1436                 |
| Binzhou      | 0.1558                | 0.0519               | 0.2950                   | 0.3468                  | 0.1496                 |
| Heze         | 0.1948                | 0.0909               | 0.3143                   | 0.3598                  | 0.0371                 |
| Zhengzhou    | 0.1818                | 0.4416               | 0.2821                   | 0.5620                  | 0.4995                 |
| Kaifeng      | 0.0909                | 0.2727               | 0.2973                   | 0.4556                  | 0.1807                 |
| Luoyang      | 0.1948                | 0.4026               | 0.3222                   | 0.5540                  | 1.0118                 |
| Pingdingshan | 0.1558                | 0.1299               | 0.2780                   | 0.4162                  | 0.0198                 |
| Anyang       | 0.1039                | 0.2468               | 0.2950                   | 0.4529                  | 0.2155                 |
| Hebi         | 0.0649                | 0.1948               | 0.2575                   | 0.4375                  | 0.0058                 |
| Xinxiang     | 0.1299                | 0.2857               | 0.2637                   | 0.4695                  | 0.0569                 |
| Jiaozuo      | 0.1169                | 0.1169               | 0.3031                   | 0.3929                  | 0.1513                 |
| Puyang       | 0.2468                | 0.0779               | 0.3598                   | 0.3565                  | 0.4667                 |
| Xuchang      | 0.1558                | 0.2338               | 0.2800                   | 0.4350                  | 0.0475                 |
| Luohe        | 0.1169                | 0.1688               | 0.2541                   | 0.4375                  | 0.0589                 |
| Sanmenxia    | 0.1688                | 0.1558               | 0.3615                   | 0.4400                  | 0.4585                 |
| Nanyang      | 0.1429                | 0.1299               | 0.2770                   | 0.3969                  | 0.0364                 |
| Shangqiu     | 0.2727                | 0.2468               | 0.3422                   | 0.4503                  | 1.0012                 |
| Xinyang      | 0.1169                | 0.1039               | 0.2750                   | 0.4031                  | 0.0101                 |
| Zhoukou      | 0.1169                | 0.1688               | 0.2646                   | 0.4375                  | 0.0804                 |
| Zhumadian    | 0.1299                | 0.1948               | 0.2760                   | 0.4231                  | 0.0300                 |
| Xi'an        | 0.0909                | 0.3506               | 0.3291                   | 0.5461                  | 0.7274                 |
| Tongchuan    | 0.1299                | 0.0649               | 0.3929                   | 0.2628                  | 0.1036                 |
| Baoji        | 0.1299                | 0.2338               | 0.3649                   | 0.4231                  | 1.2446                 |
| Xianyang     | 0.0390                | 0.2338               | 0.2810                   | 0.4639                  | 0.0861                 |
| Weinan       | 0.1039                | 0.2468               | 0.3377                   | 0.4873                  | 0.2928                 |
| Yan'an       | 0.1688                | 0.0909               | 0.3929                   | 0.2928                  | 0.4926                 |
| Hanzhong     | 0.1948                | 0.0779               | 0.4010                   | 0.4031                  | 1.0460                 |
| Yulin        | 0.1688                | 0.1299               | 0.4185                   | 0.2962                  | 0.5318                 |
| Ankang       | 0.1948                | 0.0519               | 0.4031                   | 0.3056                  | 0.5050                 |
| Shangluo     | 0.1948                | 0.0519               | 0.4031                   | 0.2444                  | 0.0153                 |
| Lanzhou      | 0.1429                | 0.1558               | 0.4053                   | 0.3407                  | 0.8401                 |
| Jiayuguan    | 0.0260                | 0.0260               | 0.2550                   | 0.2098                  | 0.0000                 |
| Jinchang     | 0.0519                | 0.0390               | 0.3043                   | 0.2278                  | 0.0317                 |
| Baiyin       | 0.1558                | 0.0649               | 0.3969                   | 0.2692                  | 0.5720                 |
| Tianshui     | 0.1429                | 0.1039               | 0.3869                   | 0.3208                  | 0.2751                 |
| Wuwei        | 0.1039                | 0.0649               | 0.3392                   | 0.2312                  | 0.1362                 |
| Zhangye      | 0.1169                | 0.0649               | 0.3377                   | 0.2194                  | 0.2781                 |
| Pingliang    | 0.2078                | 0.0130               | 0.4451                   | 0.1864                  | 0.0053                 |
| Jiuquan      | 0.0260                | 0.0649               | 0.2550                   | 0.2194                  | 0.0117                 |
| Qingyang     | 0.2727                | 0.0390               | 0.4753                   | 0.2285                  | 0.2762                 |
| Dingxi       | 0.1039                | 0.1169               | 0.3889                   | 0.3222                  | 0.5043                 |
| Longnan      | 0.1688                | 0.0260               | 0.3909                   | 0.2558                  | 0.0820                 |
| Xining       | 0.1818                | 0.0779               | 0.3831                   | 0.2610                  | 0.4273                 |
| Yinchuan     | 0.0519                | 0.1039               | 0.2973                   | 0.2533                  | 0.0996                 |
| Shizuishan   | 0.0649                | 0.0649               | 0.2984                   | 0.2110                  | 0.0390                 |
| Wuzhong      | 0.0390                | 0.1039               | 0.2884                   | 0.2525                  | 0.0525                 |

|          |        |        |        |        |        |
|----------|--------|--------|--------|--------|--------|
| Guyuan   | 0.0130 | 0.0390 | 0.2421 | 0.2188 | 0.0006 |
| Zhongwei | 0.1429 | 0.0909 | 0.3949 | 0.2452 | 0.6771 |
